# Supplementary material for: Histone demethylases UTX and JMJD3 are required for NKT cell development in mice
Source: PubMed Central journal article supplement (PMC5436453; doi:10.1186/s13578-017-0152-8), 2017-05-17
Supplement: 13578_2017_152_MOESM1_ESM.pdf [file 13578_2017_152_MOESM1_ESM.pdf]

Supplementary Table S1

| Reagents                               | Company                      | Catalog    | Notes                 |
|----------------------------------------|------------------------------|------------|-----------------------|
| CD4 Monoclonal Antibody (GK1.5)        | eBioscience                  | 53-0041-80 | Alexa488              |
| Rat Anti-Mouse CD8a Clone 53-6.7 (RUO) | BD Biosciences               | 562283     | PE-CF594              |
| Anti-mouse CD62L                       | eBioscience                  | 25-0621-82 | PE-Cy7                |
| CD44 Monoclonal Antibody (IM7)         | eBioscience                  | 56-0441-82 | Alexa Fluor 700       |
| Rat Anti-Mouse CD44 Clone IM7 (RUO)    | BD Biosciences               | 553134     | PE                    |
| CD3 Monoclonal Antibody (17A2)         | eBioscience                  | 46-0032-82 | PerCP-eFluor 710      |
| CD3e Monoclonal Antibody (145-2C11)    | eBioscience                  | 11-0031-85 | FITC                  |
| CD69 Monoclonal Antibody (H1.2F3)      | eBioscience                  | 11-0691-82 | FITC                  |
| Anti-mouse CD24                        | eBioscience                  | 25-0242-82 | PE-Cy7                |
| NK1.1 Monoclonal Antibody (PK136)      | eBioscience                  | 11-5941-82 | FITC                  |
| NK1.1 Monoclonal Antibody (PK136)      | eBioscience                  | 12-5941-82 | PE                    |
| anti-mouse NK-1.1 Antibody             | BioLegend                    | 108733     | Brilliant Violet 570™ |
| CD45.1 Monoclonal Antibody (A20)       | eBioscience                  | 25-0453-82 | PE-Cyanine7           |
| CD45.1 Monoclonal Antibody (A20)       | eBioscience                  | 45-0453-80 | PerCP-Cyanine5.5      |
| CD45.2 Monoclonal Antibody (104)       | eBioscience                  | 47-0454-82 | APC-eFluor 780        |
| mCD1d/PBS-57                           | NIH Tetramer Core Facility : | 20914      | APC-Labeled Tetramer  |
| mCD1d/Unloaded                         | NIH Tetramer Core Facility : | 20915      | APC-Labeled Tetramer  |
| Anti-H3K27me1                          | Upstate                      | 07-448     |                       |
| Anti-H3K27me2                          | Abcam                        | ab24684    |                       |
| Anti-H3K27me3                          | Upstate                      | 07-449     |                       |
