# Supplementary material for: Histone demethylases UTX and JMJD3 are required for NKT cell development in mice
Source: PubMed Central journal article supplement (PMC5436453; doi:10.1186/s13578-017-0152-8), 2017-05-17

**A**

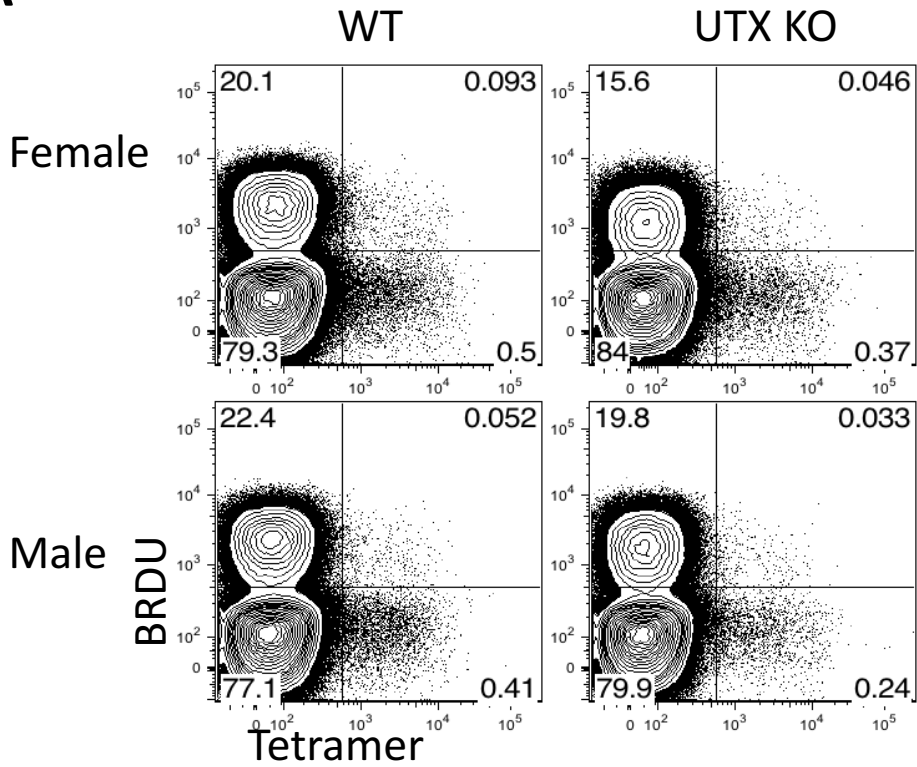

**B**

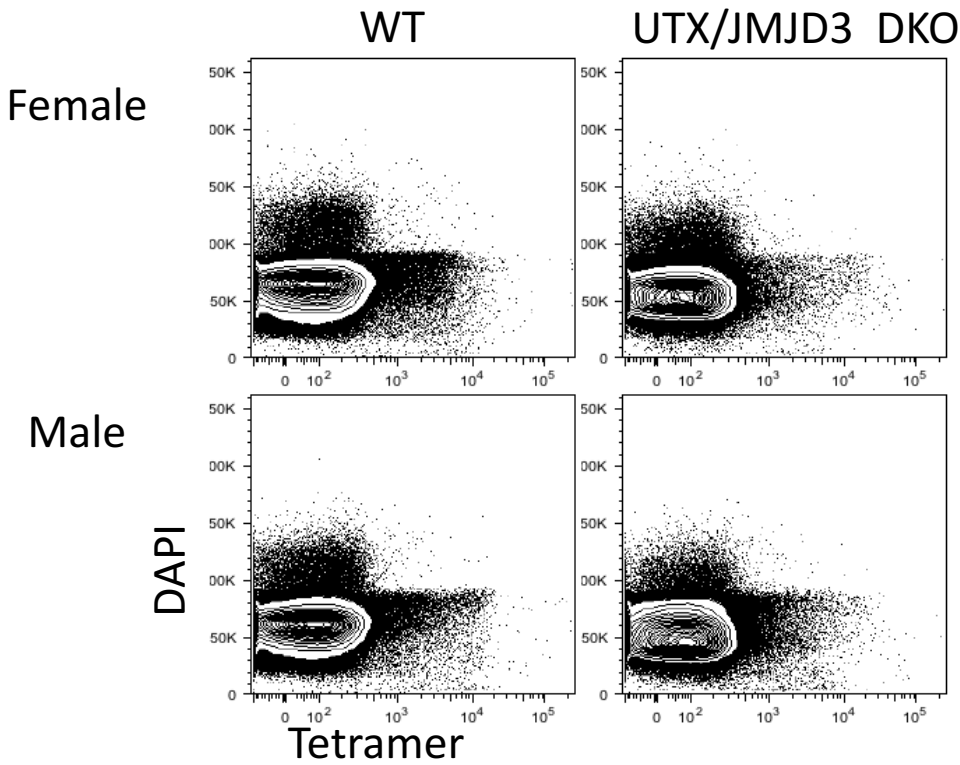

Supplement: 13578_2017_152_MOESM5_ESM.pdf [file 13578_2017_152_MOESM5_ESM.pdf]
